CORRECTION

# Correction: Comparison of porous and nano zinc oxide for replacing high-dose dietary regular zinc oxide in weaning piglets

Lina Long, Jiashun Chen, Yonggang Zhang, Xiao Liang, Hengjia Ni, Bin Zhang, Yulong Yin

There is an error in Table 1: the nutrient level for CP is 17.98, not 22.84.

The incorrect table was used for [Table 3](#). The published data of ADG, ADFI and F/G from weanling to 28d post-weaning are the ADG, ADFI and F/G from weanling to 14d post-weaning. The data of diarrhea incidence is correct. Please see the correct [Table 3](#) here.

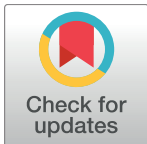

## OPEN ACCESS

**Citation:** Long L, Chen J, Zhang Y, Liang X, Ni H, Zhang B, et al. (2017) Correction: Comparison of porous and nano zinc oxide for replacing high-dose dietary regular zinc oxide in weaning piglets. PLoS ONE 12(11): e0188587. <https://doi.org/10.1371/journal.pone.0188587>

**Published:** November 17, 2017

**Copyright:** © 2017 Long et al. This is an open access article distributed under the terms of the [Creative Commons Attribution License](#), which permits unrestricted use, distribution, and reproduction in any medium, provided the original author and source are credited.

**Table 3. Growth performance and the incidence rate of diarrhea.**

| Item <sup>1</sup>  | NC                        | PC                         | HiZ                       | ZNP                      |
|--------------------|---------------------------|----------------------------|---------------------------|--------------------------|
| ADG (g/d)          | 438.62±6.31 <sup>b</sup>  | 529.24±7.71 <sup>a</sup>   | 500.22±6.22 <sup>b</sup>  | 520.41±2.78 <sup>a</sup> |
| ADFI (g/d)         | 870.08±10.19 <sup>c</sup> | 1001.57±12.09 <sup>a</sup> | 978.06±2.82 <sup>ab</sup> | 962.83±5.66 <sup>b</sup> |
| F/G                | 1.99±0.01 <sup>a</sup>    | 1.90±0.02 <sup>b</sup>     | 1.94±0.02 <sup>b</sup>    | 1.83±0.01 <sup>c</sup>   |
| Diarrhea incidence | 9.15±0.08 <sup>a</sup>    | 4.91±0.10 <sup>c</sup>     | 5.13±0.07 <sup>c</sup>    | 5.51±0.10 <sup>b</sup>   |

<sup>1</sup>ADFI, average daily feed intake; ADG, average daily gain; F/G, feed/gain ratio. Data were shown as the mean ± SEM, n = 8.

<sup>abc</sup> Mean values within different letters were significantly different (P<0.05).

<https://doi.org/10.1371/journal.pone.0188587.t001>

## Reference

1. Long L, Chen J, Zhang Y, Liang X, Ni H, Zhang B, et al. (2017) Comparison of porous and nano zinc oxide for replacing high-dose dietary regular zinc oxide in weaning piglets. PLoS ONE 12(8): e0182550. <https://doi.org/10.1371/journal.pone.0182550> PMID: 28792520
